# Supplementary material for: Defining hypoxaemia from pulse oximeter measurements of oxygen saturation in well children at low altitude in Bangladesh: an observational study
Source: HighWire-hosted journal article supplement (doi:10.1136/bmjresp-2021-001023), 2021-11-01

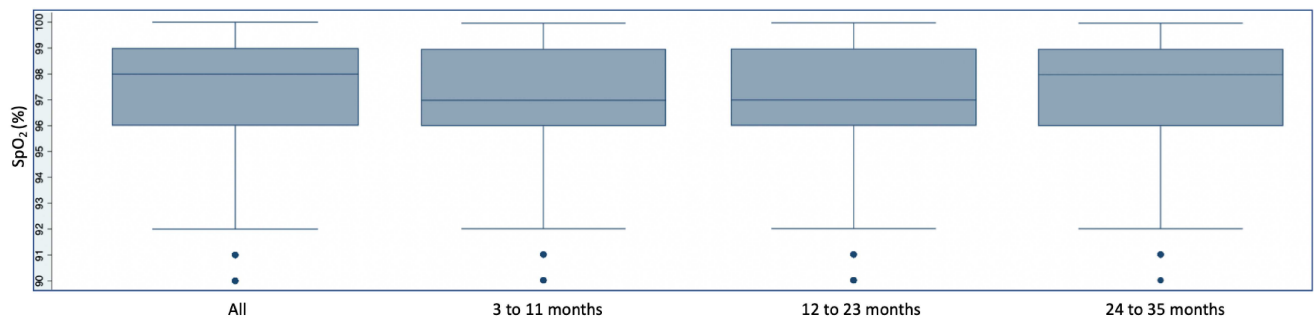

Supplement: bmjresp-2021-001023supp002_data_supplement.pdf [file bmjresp-2021-001023supp002_data_supplement.pdf]
